# Supplementary material for: Perioperative Therapy for Non-Small Cell Lung Cancer with Immune Checkpoint Inhibitors
Source: MDPI journal article supplement (doi:10.3390/cancers13164035), 2021-08-10
Supplement: s1 [file s1]

Table S1 Clinical trials of neoadjuvant therapy using combination regimens of ICIs (phase 2/3)

| Registration # | Trial                                   | Therapy       | Phase | N   | Stage                   | Experimental arm                                                                                                                                | Control arm               | Primary endpoint                                        | Country        |
|----------------|-----------------------------------------|---------------|-------|-----|-------------------------|-------------------------------------------------------------------------------------------------------------------------------------------------|---------------------------|---------------------------------------------------------|----------------|
| NCT02998528    | Checkmate 816                           | ICI<br>+chemo | 3     | 358 | IB to IIIA              | nivolumab+PT-DC                                                                                                                                 | PT-DC                     | EFS/pCR                                                 | Global         |
| NCT03425643    | KEYNOTE-671                             | ICI<br>+chemo | 3     | 786 | II to IIIB(N2)          | pembrolizumab+PT-DC<br>+adjuvant pembrolizumab                                                                                                  | placebo<br>+PT-DC         | EFS/OS                                                  | Global         |
| NCT03456063    | IMpower030                              | ICI<br>+chemo | 3     | 450 | II to IIIB(T3N2)        | atezolizumab+PT-DC                                                                                                                              | placebo<br>+PT-DC         | EFS                                                     | Global         |
| NCT03800134    | AEGEAN                                  | ICI<br>+chemo | 3     | 800 | II to III               | durvalumab+PT-DC                                                                                                                                | placebo<br>+PT-DC         | MPR/EFS                                                 | Global         |
| NCT04025879    | Checkmate 77T                           | ICI<br>+chemo | 3     | 452 | IIA(>4cm) to IIIB(T3N2) | nivolumab+PT-DC<br>+adjuvant nivolumab                                                                                                          | placebo<br>+PT-DC         | EFS                                                     | Global         |
| NCT02716038    | Columbia Univ.                          | ICI<br>+chemo | 2     | 30  | IB to IIIA              | atezolizumab<br>+CBDCA/Nab-PTX(4times)                                                                                                          | N/A                       | MPR                                                     | US             |
| NCT02572843    | SAKK16/14                               | ICI<br>+chemo | 2     | 68  | IIIA(pN2)               | durvalumab<br>+CDDP/DTX (twice)                                                                                                                 | N/A                       | EFS                                                     | Switzerland    |
| NCT03081689    | NADIM                                   | ICI<br>+chemo | 2     | 46  | IIIA(pN2)               | nivolumab<br>+CBDCA/PTX (3times)<br>+adjuvant nivolumab<br>non-SQ:<br>nivolumab<br>+CDDP/PEM (3times)<br>SQ:<br>nivolumab<br>+CDDP/GEM (3times) | N/A                       | PFS                                                     | Spain          |
| NCT03366766    | Thomas Jefferson Univ.                  | ICI<br>+chemo | 2     | 14  | I(>=4cm) to IIIA        |                                                                                                                                                 | N/A                       | MPR                                                     | US             |
| NCT03480230    | American Univ. of Beirut Medical Center | ICI<br>+chemo | 2     | 60  | II or IIIA              | avelumab+PT-DC (twice)                                                                                                                          | N/A                       | ORR                                                     | Jordan/Lebanon |
| NCT03838159    | NADIMII                                 | ICI<br>+chemo | 2     | 90  | IIIA, IIIB(T3N2)        | nivolumab<br>+CBDCA/PTX (3times)<br>+adjuvant nivolumab                                                                                         | CBDCA/PTX<br>+observation | pCR                                                     | Spain          |
| NCT04326153    | Jilin University                        | ICI<br>+chemo | 2     | 40  | IIIA                    | sintilimab<br>+CBDCA/albuminPTX (twice)                                                                                                         | N/A                       | 2-year DFS                                              | China          |
| NCT04061590    | Univ. of California                     | ICI<br>+chemo | 2     | 84  | I to IIIA               | Arm A:<br>pembrolizumab (twice)<br>Arm B:<br>pembrolizumab<br>+CDDP/PEM (twice)                                                                 | N/A                       | % of >=2-fold TIICs in post-vs. pre-treatment specimens | US             |
| NCT03217071    | Univ. of California                     | ICI<br>+CRT   | 2     | 12  | I to IIIA               | pembrolizumab (twice)<br>+/- SRT 12Gy                                                                                                           | N/A                       | % of >=2-fold infiltrating CD3+ T cells from baseline   | US             |
| NCT03237377    | Johns Hopkins Univ.                     | ICI<br>+CRT   | 2     | 32  | III                     | durvalumab+RT 45Gy<br>durvalumab<br>+tremelimumab<br>+RT 45Gy<br>durvalumab<br>+CBDCA/PTX (3times)<br>+RT 45-61.2Gy                             | N/A                       | Toxicities /Feasibility                                 | US<br>Canada   |
| NCT03871153    | HCRN LUN17-321                          | ICI<br>+CRT   | 2     | 25  | T1-4N2M0                | durvalumab<br>+CDDP/DTX<br>+RT 45Gy<br>+adjuvant durvalumab                                                                                     | N/A                       | pCR                                                     | US             |
| NCT04202809    | ESPADURVA                               | ICI<br>+CRT   | 2     | 90  | IIIA to IIIB            | durvalumab<br>+CDDP/DTX<br>+RT 45Gy<br>+adjuvant durvalumab                                                                                     | CRT                       | PFS                                                     | Germany        |
| NCT04245514    | SAKK16/18                               | ICI<br>+CRT   | 2     | 90  | T1-3&4(>7cm)N2M0        | durvalumab<br>+CDDP/DTX (once)<br>+RT: 20x2Gy(4w), 5x5Gy(1w), or 3x8Gy (1w)                                                                     | N/A                       | EFS                                                     | Switzerland    |

|                     |                            |             |     |    |           |                                      |     |     |       |
|---------------------|----------------------------|-------------|-----|----|-----------|--------------------------------------|-----|-----|-------|
| NCT036<br>94236     | Yonsei Univ.               | ICI<br>+CRT | 1/2 | 39 | III(N2)   | durvalumab<br>+CBDCA/PTX<br>+RT 45Gy | N/A | pCR | Korea |
| JapicCTI-<br>195069 | WJOG12119L:<br>SQUAT trial | ICI<br>+CRT | 1/2 | 31 | IIIA(pN2) | durvalumab<br>+CBDCA/PTX<br>+RT 45Gy | N/A | MPR | Japan |

ICI, immune checkpoint inhibitor; CRT, chemoradiotherapy; PT-DC, platinum-based doublet chemotherapy; CBDCA, carboplatin; PTX, paclitaxel; CDDP, cisplatin; DTX, docetaxel; PEM, pemetrexed; SRT, stereotactic radiotherapy; N/A, not applicable; EFS, event-free survival; OS, overall survival; MPR, major pathologic response; PFS, progression-free survival; ORR, overall response rate; pCR, pathological complete response; DFS, disease-free survival; TIIC, tumor-infiltrating immune cells
